# Supplementary material for: Colors of the Sublunar
Source: PubMed Central journal article supplement (PMC5624368; doi:10.1177/2041669517733484), 2017-09-29

# Photographic imaging

In photographic imaging the physical radiance is mapped on a standard “intensity” (say) domain.

The radiance is a non-negative quantity, it lives on  $(0, \infty)$ , whereas the intensity lives on some finite interval, here we use  $[0, 1]$  (in practice it will often be  $[0, 255]$ , this makes no essential difference).

---

## Define a scene (radiances on $(0, \infty)$ )

We need an example.

Here we use an arbitrarily chosen image (that makes it easier to judge results, it is fully irrelevant what one uses here---but if we used a random noise image no one would be able to make sense of the results) to simulate an arbitrary radiance distribution, just for kicks.

### Radiance field (no need to know how we did it)

#### Histogram

The radiance is non - negative:

```
{Min[Flatten[radiances]], Max[Flatten[radiances]]}  
{0.147022, 1.7799}
```

(Of course the histogram is irrelevant, it is just an example. Anyway, all values are positive!)

```
Histogram[Flatten[radiances]]
```

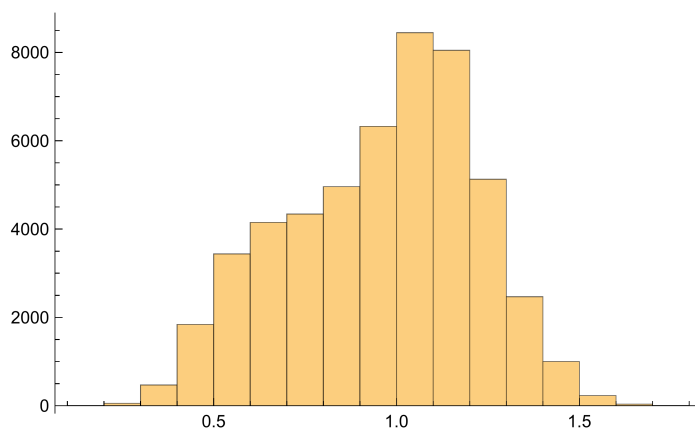

---

## Map on the log-radiance domain (on $(-\infty, +\infty)$ )

The default (Jeffreys) prior for non-negative quantities is hyperbolic, thus the natural domain is the log-domain.

```
logRadiances = Log[10, radiances];  
{Min[Flatten[logRadiances]], Max[Flatten[logRadiances]]}  
{-0.832618, 0.250396}
```

The log-radiances are distributed over  $(-\infty, +\infty)$ :

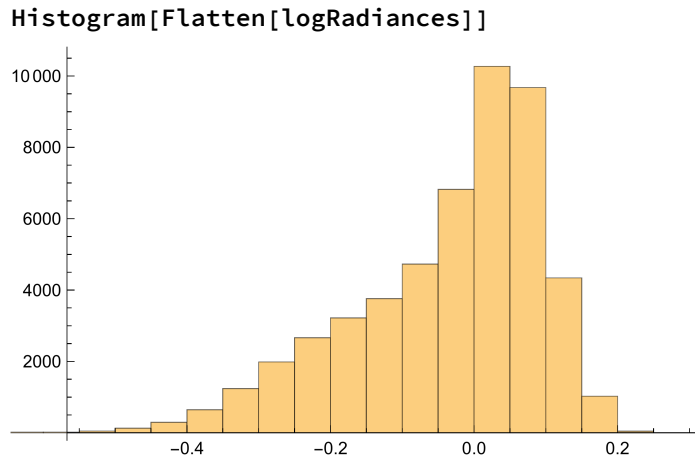

## Define compressing ogive (maps $[-\infty, +\infty]$ on $(0, 1)$ )

The imaging process implements a compression, mapping  $(-\infty, +\infty)$  on  $(0, 1)$ .  
We model it with some ogive function omega (any will do)

```
omega[x_] := (1 + Tanh[x]) / 2;
```

```
Plot[omega[x], {x, -4, 4}, PlotStyle -> {Thick, Blue}, Filling -> Axis]
```

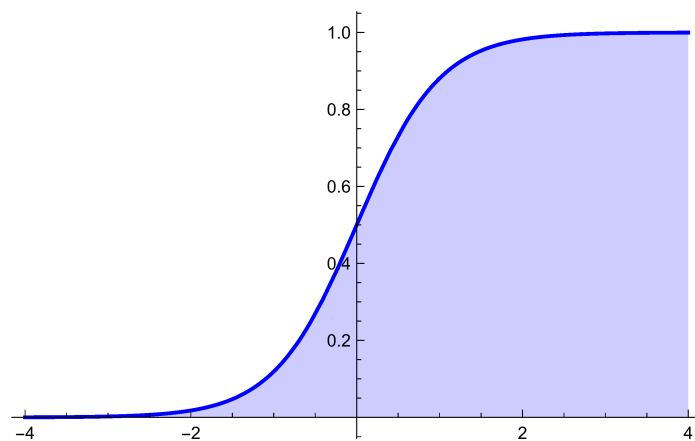

## Examples

Now we may start imaging!

The parameters are the “exposure”, the “contrast range” and the “gamma”.

Here we shift omega, this is what “exposure” does:

```
Plot[Evaluate[Table[omega[x - x0], {x0, -2, 2}]], {x, -4, 4}, PlotStyle -> Thick]
```

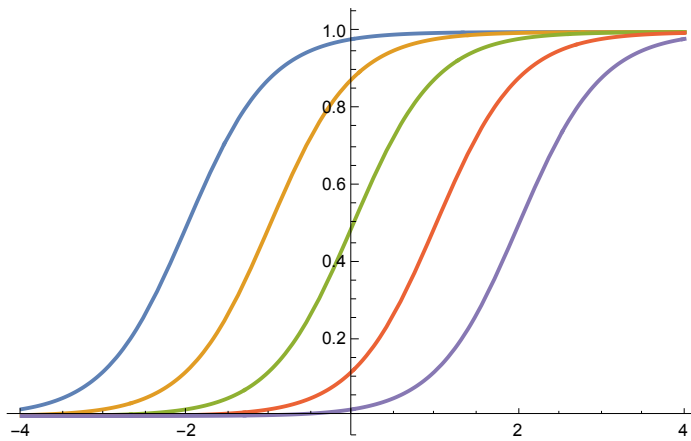

Here we stretch omega, this is what “contrastRange” does:

```
Plot[Evaluate[Table[omega[x / 2^i], {i, -2, 2}]], {x, -4, 4}, PlotStyle -> Thick]
```

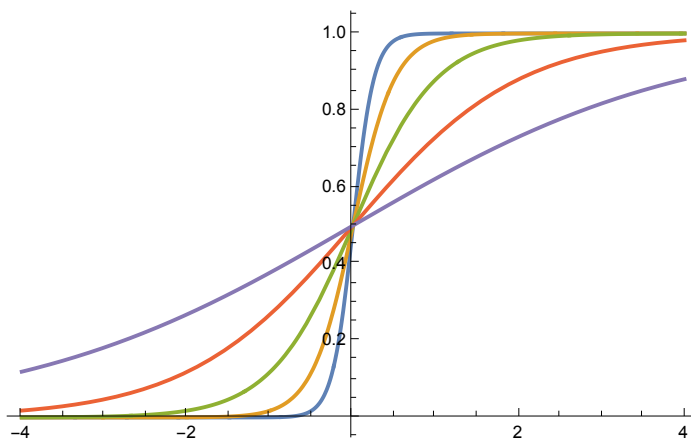

For a start we ignore the gamma-transformation.

## A

Notice: “exposure” is WHERE we apply omega, whereas “contrastRange” is how much we stretch omega.

Here is the first example:

```
exposure = -0.1;
```

```
contrastRange = 0.2;
```

```
mappedLogRadiance =
```

```
  Map[omega[(# - exposure) / contrastRange] &, logRadiances, {2}];
  {Min[Flatten[mappedLogRadiance]], Max[Flatten[mappedLogRadiance]]}
  {0.000657653, 0.9708}
```

The intensities are limited to (0,1):

Histogram[Flatten[mappedLogRadiance]]

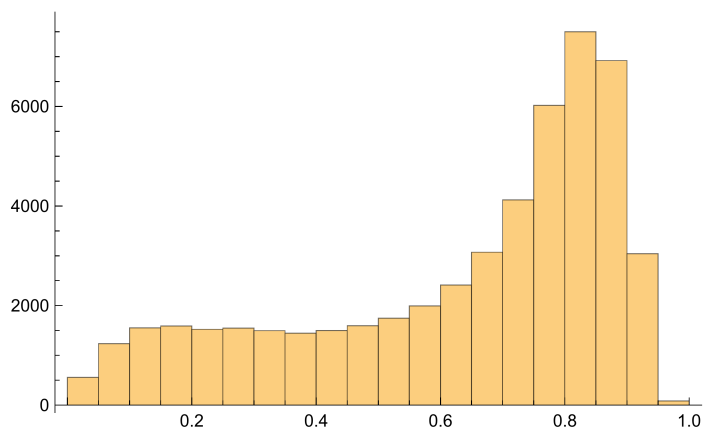

Here is the image:

Image[mappedLogRadiance]

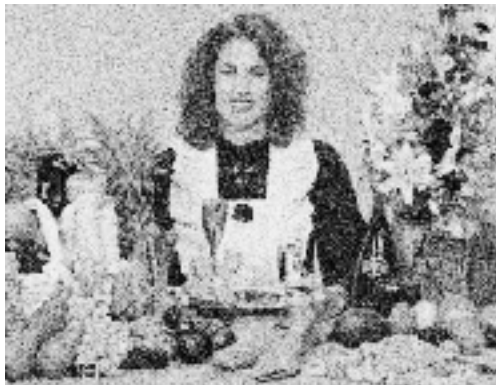

## B

Here is another shot, changing the exposure and the contrast range:

```
exposure = -0.2;
```

```
contrastRange = 0.1;
```

```
mappedLogRadiance =
```

```
  Map[omega[(# - exposure) / contrastRange] &, logRadiances, {2}];
  {Min[Flatten[mappedLogRadiance]], Max[Flatten[mappedLogRadiance]]}
  {3.20002 × 10-6, 0.999878}
```

Histogram[Flatten[mappedLogRadiance]]

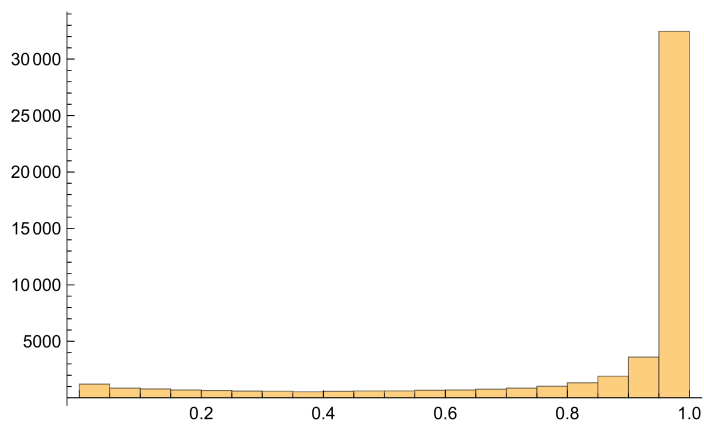

Image[mappedLogRadiance]

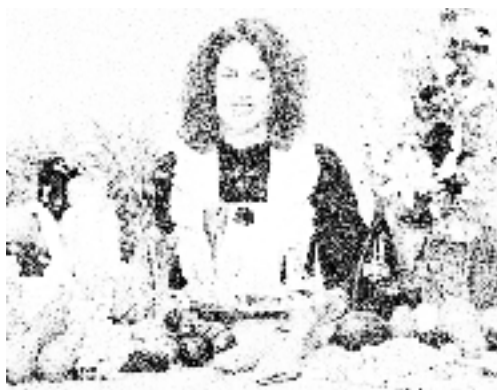

C

Yet another shot:

```
exposure = 0;
```

```
contrastRange = 0.4;
```

```
mappedLogRadiance =
```

```
  Map[omega[(# - exposure) / contrastRange] &, logRadiances, {2}];
  {Min[Flatten[mappedLogRadiance]], Max[Flatten[mappedLogRadiance]]}
  {0.0153211, 0.777642}
```

Histogram[Flatten[mappedLogRadiance]]

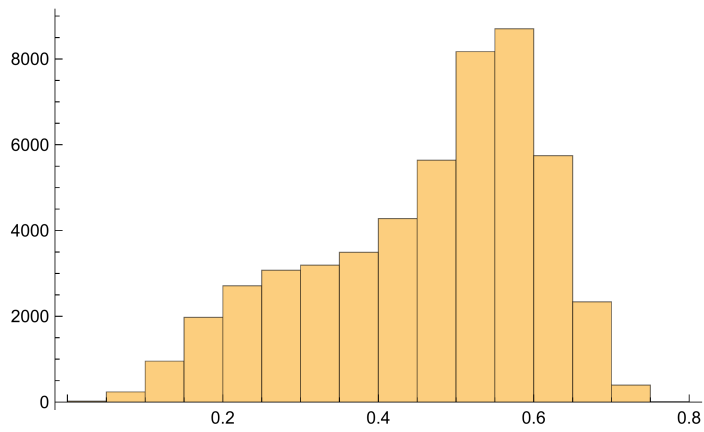

Image[mappedLogRadiance]

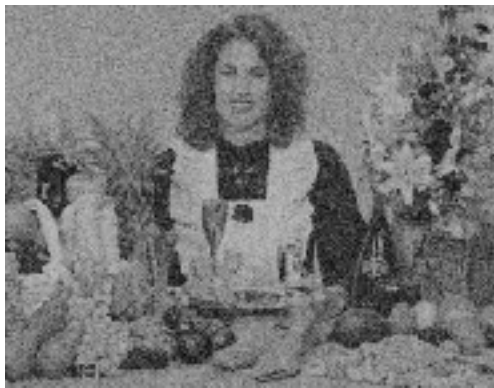

## D

Apparently exposure and contrast range yield a lot of freedom. Now we introduce a gamma-transformation.

This is what gamma transformation does:

```
Plot[Evaluate[Table[x^(2^i), {i, -2, 2}], {x, 0, 1},
  AspectRatio → Automatic, AxesLabel → {"input intensity", "output intensity"}]
```

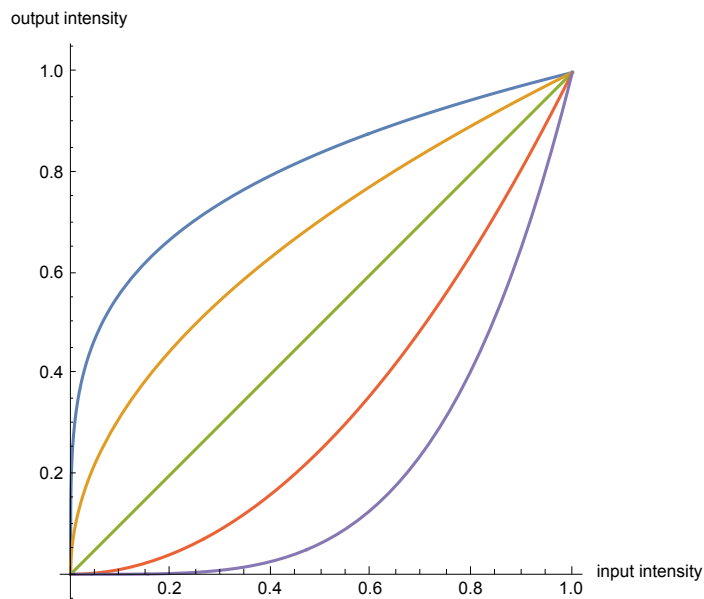

We can also show it as a change of the omega function:

```
Plot[Evaluate[Table[omega[x]^(2^i), {i, -2, 2}], {x, -4, 4}, PlotStyle → Thick]
```

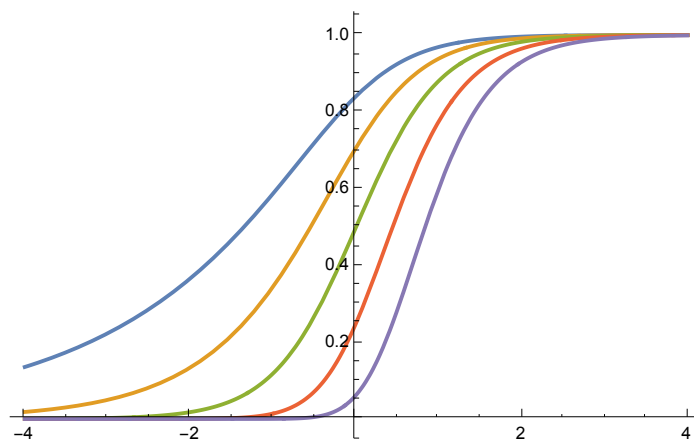

A gamma is very similar to some combined exposure-contrastRange change. We show it mainly because so common.

```
exposure = 0;
```

```
contrastRange = 0.4;
```

```
gamma = 1.5;
```

```
mappedLogRadiance =
```

```
  Map[(omega[# - exposure] / contrastRange) ^ gamma &, logRadiances, {2}];
  {Min[Flatten[mappedLogRadiance]], Max[Flatten[mappedLogRadiance]]}
  {0.00189641, 0.685756}
```

Histogram[Flatten[mappedLogRadiance]]

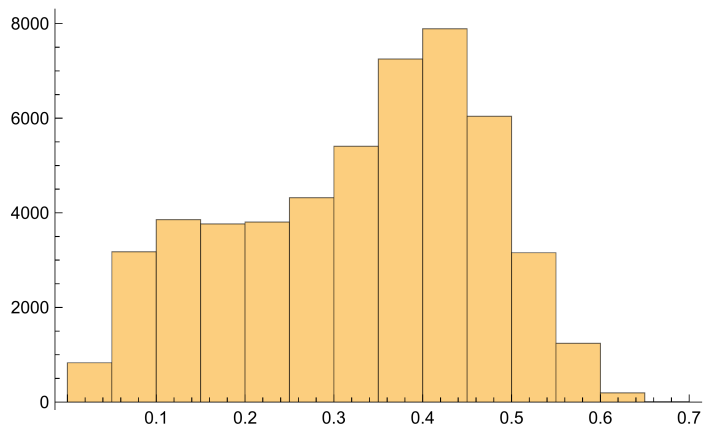

Image[mappedLogRadiance]

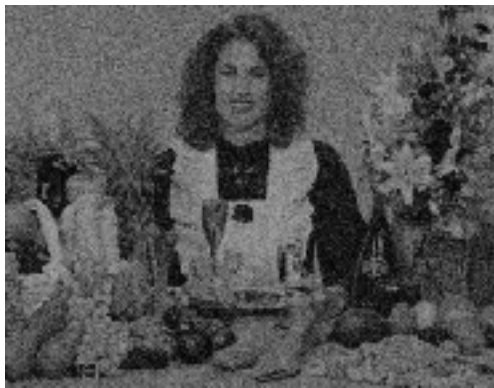

## E

Here is the same exposure 0, the same contrast range, but a different gamma:

```

exposure = 0;
contrastRange = 0.4;

gamma = 0.5;

mappedLogRadiance =
  Map[(omega[(# - exposure) / contrastRange]) ^ gamma &, logRadiances, {2}];
{Min[Flatten[mappedLogRadiance]], Max[Flatten[mappedLogRadiance]]}
{0.123778, 0.88184}

```



Histogram[Flatten[mappedLogRadiance]]

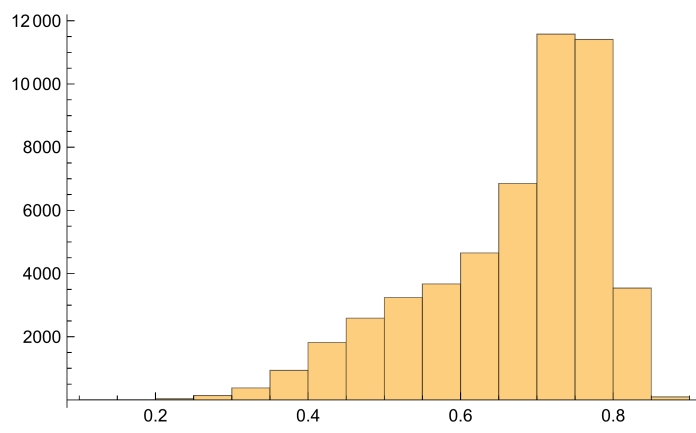

Image[mappedLogRadiance]

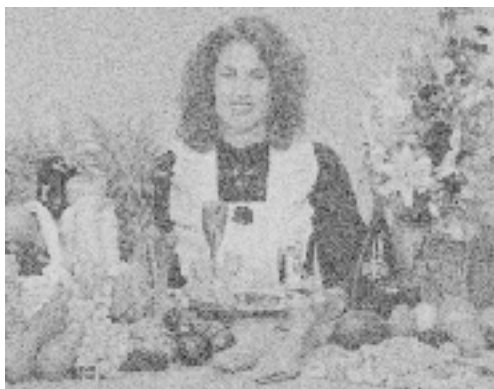

Supplement: Imaging.pdf [file Imaging.pdf]
